# Supplementary material for: Regulation of π⋯π stacking interactions between triimidazole luminophores and comprehensive emission quenching by coordination to Cu(ii)
Source: Royal Society of Chemistry journal article supplement (doi:10.1039/d1nj00909e), 2021-01-01
Supplement: d1nj00909e1.pdf [file d1nj00909e1.pdf]

## Supporting Information for the article

### REGULATION OF $\pi \cdots \pi$ STACKING INTERACTIONS BETWEEN TRIIMIDAZOLE LUMINOPHORES AND COMPREHENSIVE EMISSION QUENCHING BY COORDINATION TO Cu(II)

Elena Melnic,<sup>1</sup> Victor Ch. Kravtsov,<sup>1</sup> Elena Lucenti,<sup>2</sup> Elena Cariati,<sup>2,3</sup> Alessandra Forni,<sup>2</sup>  
Nikita Siminel,<sup>1</sup> Marina S. Fonari,<sup>1,\*</sup>

*E-mails:* [elena.melnic@ifa.md](mailto:elena.melnic@ifa.md); [victor.kravtsov@ifa.md](mailto:victor.kravtsov@ifa.md); [elena.lucenti@istm.cnr.it](mailto:elena.lucenti@istm.cnr.it);  
[elena.cariati@unimi.it](mailto:elena.cariati@unimi.it); [alessandra.forni@scitec.cnr.it](mailto:alessandra.forni@scitec.cnr.it); [siminel.n@gmail.com](mailto:siminel.n@gmail.com);  
[marina.fonari@ifa.md](mailto:marina.fonari@ifa.md)

<sup>1</sup>Institute of Applied Physics, Academy str., 5 MD2028, Chisinau, R. Moldova.

<sup>2</sup>Institute of Sciences and Chemical Technologies “Giulio Natta” (SCITEC) of CNR and INSTM RU, via Golgi 19, 20133 Milano, Italy.

<sup>3</sup>Dipartimento di Chimica, Università degli Studi di Milano and INSTM RU, via Golgi 19, 20133 Milano, Italy.

**Table S1.** Selected bond lengths (Å) in coordination metal environment in **1-8**.

| <b>1</b>                 |           |                 |           |
|--------------------------|-----------|-----------------|-----------|
| Cu(1)-N(1)               | 2.213(6)  | Cu(1)-O(3)      | 1.972(5)  |
| Cu(1)-O(1)               | 1.960(5)  | Cu(1)-O(4)      | 1.951(6)  |
| Cu(1)-O(2)               | 1.952(4)  |                 |           |
| O(1)-Cu(1)-N(1)          | 89.6(2)   | O(4)-Cu(1)-O(1) | 89.6(2)   |
| O(2)-Cu(1)-N(1)          | 96.26(19) | O(4)-Cu(1)-N(1) | 95.1(2)   |
| O(2)-Cu(1)-O(4)          | 168.6(2)  | O(3)-Cu(1)-O(1) | 89.5(2)   |
| O(2)-Cu(1)-O(3)          | 89.4(2)   | O(3)-Cu(1)-N(1) | 102.0(2)  |
| O(2)-Cu(1)-O(1)          | 89.6(2)   | O(4)-Cu(1)-O(3) | 89.2(2)   |
| <b>2</b>                 |           |                 |           |
| Cu(1)-O(1)               | 1.973(4)  | Cu(1)-O(4)      | 1.968(4)  |
| Cu(1)-O(2)               | 1.960(4)  | Cu(1)-N(1)      | 2.240(4)  |
| Cu(1)-O(3)               | 1.973(4)  |                 |           |
| O(1)-Cu(1)-O(3)          | 168.7(1)  | O(4)-Cu(1)-O(3) | 89.4(2)   |
| O(1)-Cu(1)-N(1)          | 99.6(2)   | O(4)-Cu(1)-N(1) | 89.7(2)   |
| O(2)-Cu(1)-O(4)          | 168.2(2)  | O(2)-Cu(1)-N(1) | 101.9(2)  |
| O(2)-Cu(1)-O(1)          | 91.1(2)   | O(3)-Cu(1)-N(1) | 91.7(2)   |
| O(2)-Cu(1)-O(3)          | 88.0(2)   | O(4)-Cu(1)-O(1) | 89.2(2)   |
| <b>3</b>                 |           |                 |           |
| Cu(1)-O(1A)              | 2.02(2)   | Cu(4)-O(6B)     | 1.93(2)   |
| Cu(1)-O(3A)              | 1.97(2)   | Cu(4)-O(2B)     | 1.95(2)   |
| Cu(1)-O(5A)              | 1.94(2)   | Cu(4)-O(8B)     | 1.96(3)   |
| Cu(1)-O(7A)              | 1.92(3)   | Cu(4)-O(4B)     | 2.04(2)   |
| Cu(1)-N(1B) <sup>f</sup> | 2.19(2)   | Cu(4)-N(3B)     | 2.19(2)   |
| Cu(2)-O(6A)              | 1.94(2)   | Cu(5)-O(3C)     | 1.952(14) |
| Cu(2)-O(8A)              | 1.95(2)   | Cu(5)-O(7C)     | 1.958(14) |
| Cu(2)-O(4A)              | 1.99(2)   | Cu(5)-O(5C)     | 1.958(14) |
| Cu(2)-O(2A)              | 2.05(2)   | Cu(5)-O(1C)     | 1.97(2)   |

|                                |           |                               |           |
|--------------------------------|-----------|-------------------------------|-----------|
| Cu(2)-N(1A)                    | 2.13(3)   | Cu(5)-O(1w)                   | 2.11(2)   |
| Cu(1)-Cu(2)                    | 2.636(3)  | Cu(6)-O(8C)                   | 1.950(14) |
| Cu(3)-O(1B)                    | 2.00(2)   | Cu(6)-O(2C)                   | 1.965(14) |
| Cu(3)-O(3B)                    | 1.98(3)   | Cu(6)-O(4C)                   | 1.987(13) |
| Cu(3)-O(5B)                    | 1.99(2)   | Cu(6)-O(6C)                   | 1.986(14) |
| Cu(3)-O(7B)                    | 1.90(2)   | Cu(6)-N(1C)                   | 2.21(2)   |
| Cu(3)-N(3A)                    | 2.22(3)   |                               |           |
| O(7A)-Cu(1)-O(5A)              | 89.0(12)  | O(6B)-Cu(4)-O(2B)             | 170.1(10) |
| O(7A)-Cu(1)-O(3A)              | 166.3(10) | O(6B)-Cu(4)-O(8B)             | 91.7(11)  |
| O(5A)-Cu(1)-O(3A)              | 89.0(11)  | O(2B)-Cu(4)-O(8B)             | 88.8(11)  |
| O(7A)-Cu(1)-O(1A)              | 89.5(11)  | O(6B)-Cu(4)-O(4B)             | 89.1(11)  |
| O(5A)-Cu(1)-O(1A)              | 174.3(10) | O(2B)-Cu(4)-O(4B)             | 87.8(10)  |
| O(3A)-Cu(1)-O(1A)              | 91.2(10)  | O(8B)-Cu(4)-O(4B)             | 164.3(10) |
| O(7A)-Cu(1)-N(1B) <sup>f</sup> | 96.9(11)  | O(6B)-Cu(4)-N(3B)             | 96.5(10)  |
| O(5A)-Cu(1)-N(1B) <sup>f</sup> | 89.6(9)   | O(2B)-Cu(4)-N(3B)             | 93.2(10)  |
| O(3A)-Cu(1)-N(1B) <sup>f</sup> | 96.6(9)   | O(8B)-Cu(4)-N(3B)             | 99.5(10)  |
| O(1A)-Cu(1)-N(1B) <sup>f</sup> | 96.0(9)   | O(4B)-Cu(4)-N(3B)             | 96.0(10)  |
| O(6A)-Cu(2)-O(8A)              | 91.0(11)  | O(3C)-Cu(5)-O(7C)             | 168.6(14) |
| O(6A)-Cu(2)-O(4A)              | 84.4(11)  | O(3C)-Cu(5)-O(5C)             | 93.5(13)  |
| O(8A)-Cu(2)-O(4A)              | 169.1(10) | O(7C)-Cu(5)-O(5C)             | 87.4(13)  |
| O(6A)-Cu(2)-O(2A)              | 162.7(10) | O(3C)-Cu(5)-O(1C)             | 92.3(14)  |
| O(8A)-Cu(2)-O(2A)              | 87.2(10)  | O(7C)-Cu(5)-O(1C)             | 85.2(15)  |
| O(4A)-Cu(2)-O(2A)              | 94.3(10)  | O(5C)-Cu(5)-O(1C)             | 169.9(14) |
| O(6A)-Cu(2)-N(1A)              | 100.1(10) | O(3C)-Cu(5)-O(1w)             | 93.6(10)  |
| O(8A)-Cu(2)-N(1A)              | 92.9(10)  | O(7C)-Cu(5)-O(1w)             | 97.4(11)  |
| O(4A)-Cu(2)-N(1A)              | 97.7(11)  | O(5C)-Cu(5)-O(1w)             | 101.5(10) |
| O(2A)-Cu(2)-N(1A)              | 97.2(10)  | O(1C)-Cu(5)-O(1w)             | 86.3(10)  |
| O(7B)-Cu(3)-O(3B)              | 171.1(10) | O(8C)-Cu(6)-O(2C)             | 87.7(13)  |
| O(7B)-Cu(3)-O(5B)              | 91.7(11)  | O(8C)-Cu(6)-O(4C)             | 168.8(13) |
| O(3B)-Cu(3)-O(5B)              | 91.3(11)  | O(2C)-Cu(6)-O(4C)             | 87.8(12)  |
| O(7B)-Cu(3)-O(1B)              | 85.4(11)  | O(8C)-Cu(6)-O(6C)             | 89.2(12)  |
| O(3B)-Cu(3)-O(1B)              | 89.8(11)  | O(2C)-Cu(6)-O(6C)             | 167.6(13) |
| O(5B)-Cu(3)-O(1B)              | 166.5(10) | O(4C)-Cu(6)-O(6C)             | 93.0(13)  |
| O(7B)-Cu(3)-N(3A)              | 93.6(11)  | O(8C)-Cu(6)-N(1C)             | 93.6(11)  |
| O(3B)-Cu(3)-N(3A)              | 94.5(11)  | O(2C)-Cu(6)-N(1C)             | 98.5(10)  |
| O(5B)-Cu(3)-N(3A)              | 93.0(10)  | O(4C)-Cu(6)-N(1C)             | 97.3(11)  |
| O(1B)-Cu(3)-N(3A)              | 100.3(10) | O(6C)-Cu(6)-N(1C)             | 93.7(10)  |
| <b>4</b>                       |           |                               |           |
| Cu(1)-N(1)                     | 2.010(2)  | Cu(1)-O(1)                    | 1.929(2)  |
| N(1)-Cu(1)-O(1)                | 90.28(9)  | N(1)-Cu(1)-O(1) <sup>c</sup>  | 89.72(9)  |
| <b>5</b>                       |           |                               |           |
| Cu(1)-N(1)                     | 2.000(4)  | Cu(1)-N(7)                    | 2.002(4)  |
| Cu(1)-O(1)                     | 2.40(3)   |                               |           |
| N(1)-Cu(1)-N(7)                | 90.4(2)   | N(7) <sup>b</sup> -Cu(1)-O(1) | 83.6(7)   |
| N(7)-Cu(1)-O(1)                | 96.4(7)   | N(1)-Cu(1)-O(1)               | 96.0(8)   |
| N(1)-Cu(1)-O(1) <sup>b</sup>   | 84.0(8)   |                               |           |
| <b>6</b>                       |           |                               |           |
| Cu(1)-N(1)                     | 2.060(3)  | Cu(1)-N(7)                    | 2.016(3)  |
| Cu(1)-O(1)                     | 2.425(2)  |                               |           |
| N(1)-Cu(1)-N(7)                | 90.54(11) | N(1)-Cu(1)-O(1) <sup>a</sup>  | 94.36(10) |

|                               |           |                               |           |
|-------------------------------|-----------|-------------------------------|-----------|
| N(7)-Cu(1)-O(1)               | 93.37(10) | N(1)-Cu(1)-O(1)               | 85.64(10) |
| N(7) <sup>a</sup> -Cu(1)-O(1) | 86.63(10) |                               |           |
| <b>7</b>                      |           |                               |           |
| Cu(1)-N(1)                    | 2.001(3)  | Cu(1)-O(1w)                   | 2.026(3)  |
| Cu(1)-O(1)                    | 2.330(3)  |                               |           |
| N(1)-Cu(1)-O(1)               | 88.33(13) | N(1)-Cu(1)-O(1w) <sup>d</sup> | 86.69(14) |
| N(1)-Cu(1)-O(1) <sup>d</sup>  | 91.67(13) | O(1w)-Cu(1)-O(1) <sup>d</sup> | 87.87(12) |
| N(1)-Cu(1)-O(1w)              | 93.31(14) | O(1w)-Cu(1)-O(1)              | 92.13(12) |
| <b>8</b>                      |           |                               |           |
| Cu(1)-O(1)                    | 1.957(5)  | Cu(1)-N(1)                    | 2.002(6)  |
| Cu(1)-O(4)                    | 1.979(5)  | Cu(1)-N(7)                    | 1.980(6)  |
| O(1)-Cu(1)-O(4)               | 87.1(2)   | O(1)-Cu(1)-N(1)               | 164.1(2)  |
| O(1)-Cu(1)-N(7)               | 91.8(2)   | O(4)-Cu(1)-N(1)               | 90.1(2)   |
| O(4)-Cu(1)-N(7)               | 172.56(2) | N(7)-Cu(1)-N(1)               | 92.9(2)   |

Symmetry transformations used to generate equivalent atoms: <sup>a)</sup> -x, 1-y, -z; <sup>b)</sup> 1-x, -y, 1-z; <sup>c)</sup> 2-x, 1-y, -z; <sup>d)</sup> 1-x, -y, -z; <sup>e)</sup> 1-x, 1-y, -z; <sup>f)</sup> x+1, y+1, z;

**Table S2.** Geometric parameters of hydrogen bonds [distances (Å) and angles(°)] for **2-4, 6-8**.

| D-H...A               | d(H...A), Å | d(D...A), Å | ∠DHA, ° | Symmetry operation for acceptor |
|-----------------------|-------------|-------------|---------|---------------------------------|
| <b>2</b>              |             |             |         |                                 |
| C(7)-H(7)...O(1)      | 2.37        | 3.234(7)    | 154.1   | x, y, z                         |
| C(14)-H(14)...N(3)    | 2.24        | 3.021(8)    | 141.6   | x, y, z                         |
| C(13)-H(13)...N2      | 2.57        | 3.490(9)    | 170.2   | x-1, y-1, z                     |
| <b>3</b>              |             |             |         |                                 |
| O(1w)-H(1w1)...N(2C)  | 2.01(2)     | 2.84(2)     | 152(4)  | x-1, y-1, z                     |
| O(2w)-H(1w2)...N(3C)  | 1.98        | 2.95(2)     | 162.6   | x, y, z                         |
| O(2w)-H(2w2)...O(3A)  | 2.01        | 2.89(2)     | 146.8   | x, y-1, z                       |
| O(3w)-H(1w3)...O(8A)  | 2.06        | 2.94(3)     | 147.6   | x, y, z                         |
| O(3w)-H(2w3)...O(1C)  | 2.01        | 2.95(5)     | 159.3   | x, y+1, z-1                     |
| C(13A)-H(13B)...O(7A) | 2.64        | 3.31(4)     | 128.0   | x-1, y, z                       |
| C(15A)-H(15A)...O(2C) | 2.60        | 3.53(5)     | 165.2   | x, y+1, z-1                     |
| C(17A)-H(17B)...O(4A) | 2.53        | 3.40(5)     | 150.8   | x+1, y, z                       |
| C(11C)-H(11H)...O(3w) | 2.44        | 3.25(6)     | 142.0   | x, y-1, z+1                     |
| C(1A)-H(1A)...O(7C)   | 2.59        | 3.43(4)     | 150.7   | x, y+1, z-1                     |
| C(6A)-H(6A)...N(2B)   | 2.42        | 3.35(4)     | 172.9   | x-1, y, z-1                     |
| C(9A)-H(9A)...O(1B)   | 2.50        | 3.11(4)     | 122.7   | x, y, z                         |
| C(3B)-H(3B)...O(4C)   | 2.47        | 3.34(4)     | 156.2   | x-1, y, z                       |
| C(6B)-H(6B)...N(2A)   | 2.47        | 3.39(4)     | 172.0   | x+1, y, z+1                     |
| C(9B)-H(9B)...O(6B)   | 2.19        | 2.90(4)     | 132.4   | x, y, z                         |
| C(4C)-H(4C)...O(3w)   | 2.54        | 3.30(4)     | 140.2   | x+1, y, z+1                     |
| C(7C)-H(7C)...O(6B)   | 2.62        | 3.29(4)     | 129.4   | x+1, y, z                       |
| C(9C)-H(9C)...O(6C)   | 2.43        | 2.97(3)     | 116.5   | x, y, z                         |
| C(9C)-H(9C)...O(2w)   | 2.48        | 3.28(2)     | 144.9   | x, y, z                         |
| <b>4</b>              |             |             |         |                                 |
| C(1)-H(1)...O(2)      | 2.42        | 3.259(4)    | 150.2   | -x+1, -y+1, -z                  |
| C(3)-H(3)...O(2)      | 2.45        | 3.281(4)    | 148.1   | -x+1, -y+1, -z                  |
| C(4)-H(4)...N(2)      | 2.66        | 3.424(4)    | 139.8   | -x, -y, -z+1                    |

|                                                           |         |           |        |                      |
|-----------------------------------------------------------|---------|-----------|--------|----------------------|
| C(7)-H(7)⋯O(1)                                            | 2.32    | 3.192(3)  | 156.3  | -x+2, -y+1, -z+1     |
| <b>6</b>                                                  |         |           |        |                      |
| C(3)-H(3)⋯N(8)                                            | 2.45    | 3.315(5)  | 155.3  | -x+1, -y+1, -z+1     |
| C(6)-H(6)⋯O(1)                                            | 2.45    | 3.375(5)  | 173.3  | x, -y+3/2, z+1/2     |
| C(10)-H(10)⋯O(2)                                          | 2.30    | 3.137(5)  | 149.2  | x, y, z              |
| C(15)-H(15)⋯N(9)                                          | 2.54    | 3.415(5)  | 157.5  | x, y, z+1            |
| C(16)-H(16)⋯O(2)                                          | 2.30    | 3.227(5)  | 172.2  | x, y, z+1            |
| C(3)-H(3)⋯N(8)                                            | 2.45    | 3.315(5)  | 155.3  | -x+1, -y+1, -z+1     |
| <b>7</b>                                                  |         |           |        |                      |
| O(2 <sub>w</sub> )-H(2 <sub>w2</sub> )⋯N(2)               | 2.11    | 2.906(5)  | 155.1  | x+1/2, -y+1/2, z+1/2 |
| O(2 <sub>w</sub> )-H(1 <sub>w2</sub> )⋯N(3)               | 2.01    | 2.837(5)  | 163.1  | x, y, z              |
| O(1 <sub>w</sub> )-H(1 <sub>w1</sub> )⋯O(2 <sub>w</sub> ) | 1.80(2) | 2.667(4)  | 175(3) | x, y, z-1            |
| O(1 <sub>w</sub> )-H(2 <sub>w1</sub> )⋯N(8)               | 2.55    | 3.317(5)  | 146.2  | x, y, z              |
| O(1 <sub>w</sub> )-H(2 <sub>w1</sub> )⋯O(2)               | 1.83    | 2.703(5)  | 173.5  | x, y, z              |
| C(1)-H(1)⋯O(1)                                            | 2.58    | 3.120(6)  | 117.7  | -x+1, -y, -z         |
| C(2)-H(2)⋯O(1)                                            | 2.48    | 3.285(5)  | 145.2  | x-1, y, z            |
| C(4)-H(4)⋯N(4)                                            | 2.51    | 3.036(6)  | 115.8  | x, y, z              |
| C(5)-H(5)⋯O(1)                                            | 2.58    | 3.079(5)  | 114.2  | x, y, z              |
| C(7)-H(7)⋯O(3)                                            | 2.53    | 3.431(6)  | 164.0  | x-1, y, z            |
| C(9)-H(9)⋯O(3)                                            | 2.40    | 3.285(6)  | 158.2  | x-3/2, -y+1/2, z+1/2 |
| C(10)-H(10)⋯O(2)                                          | 2.53    | 3.324(6)  | 143.2  | x-1, y, z+1          |
| C(13)-H(13)⋯N(4)                                          | 2.66    | 3.462(5)  | 144.5  | -x+1, -y, -z+1       |
| <b>8</b>                                                  |         |           |        |                      |
| C(1)-H(1)⋯O(5)                                            | 2.23    | 3.142(8)  | 166.4  | x-1, y, z            |
| C(2)-H(2)⋯N(3)                                            | 2.35    | 3.243(9)  | 159.6  | -x, -y+1, -z         |
| C(4)-H(4)⋯O(5)                                            | 2.62    | 3.494(10) | 157.6  | -x+1, -y+1, -z       |
| C(5)-H(5)⋯N(2)                                            | 2.42    | 3.327(8)  | 164.6  | -x+2, -y+2, -z       |
| C(7)-H(7)⋯O(6)                                            | 2.20    | 3.119(9)  | 172.1  | x+1, y+1, z          |
| C(11)-H(11)⋯O(6)                                          | 2.58    | 3.445(9)  | 154.8  | x+1, y+1, z          |
| C(14)-H(14)⋯O(1)                                          | 2.65    | 3.264(9)  | 124.3  | -x+1, -y+2, -z+1     |

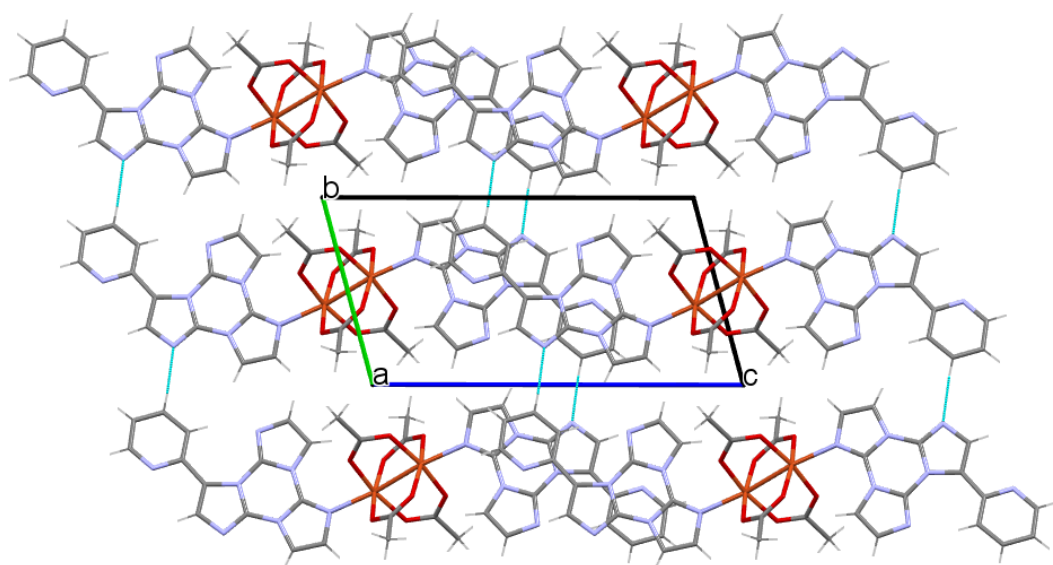

**Figure S1.** Fragments of two H-bonded chains in **2** with indication of CH...N hydrogen bonds.

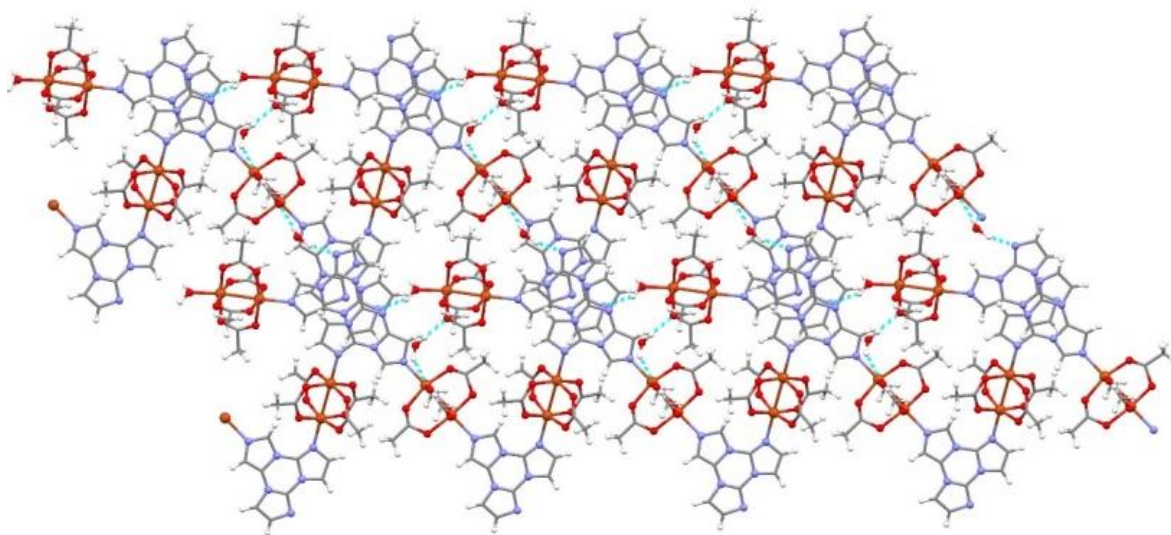

**Figure S2.** Fragment of supramolecular layer in **3**.

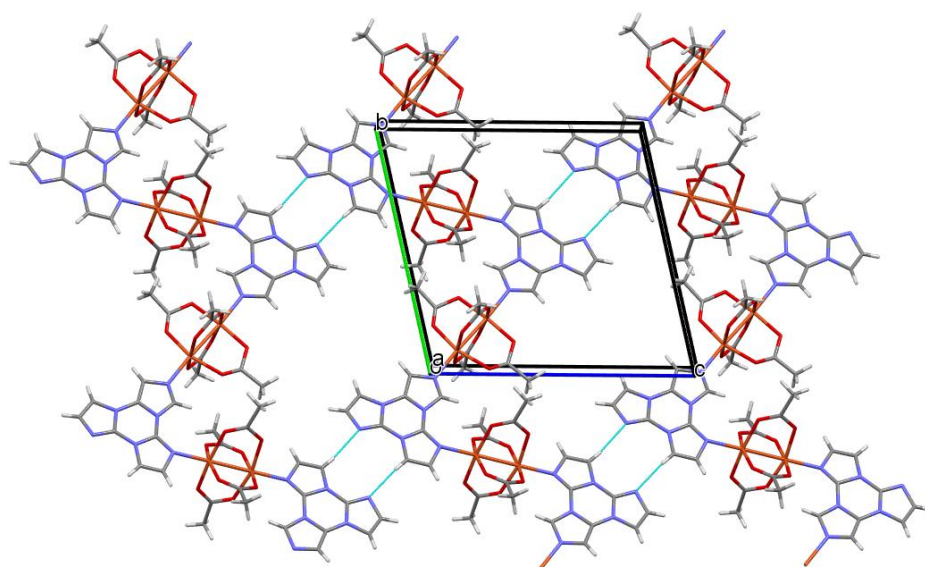

**Figure S3.** Association of coordination chains in the H-bonded layer in **3**.

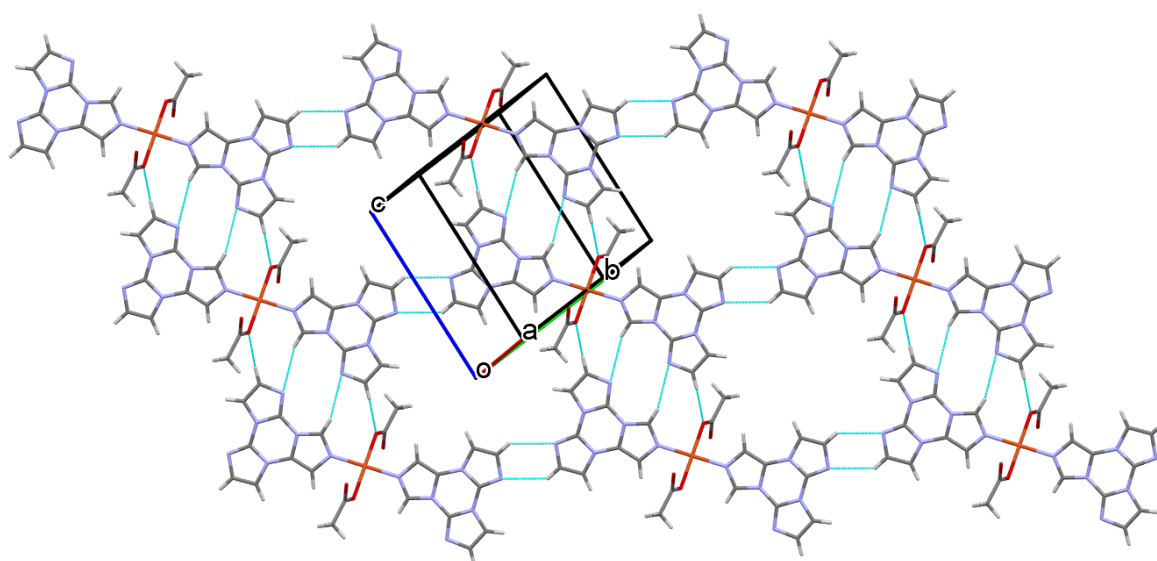

**Figure S4.** Association of complexes **4** in H-bonded layer.

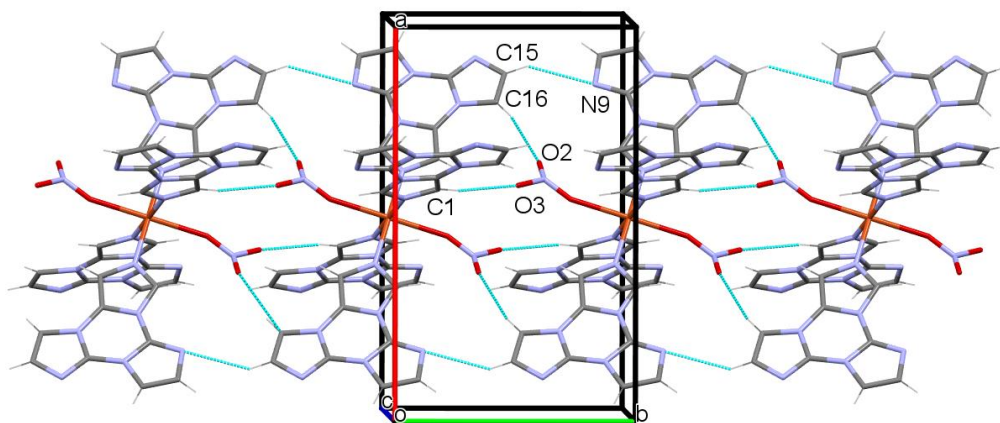

**Figure S5.** Association of mononuclear complexes in H-bonded chain in **5**.

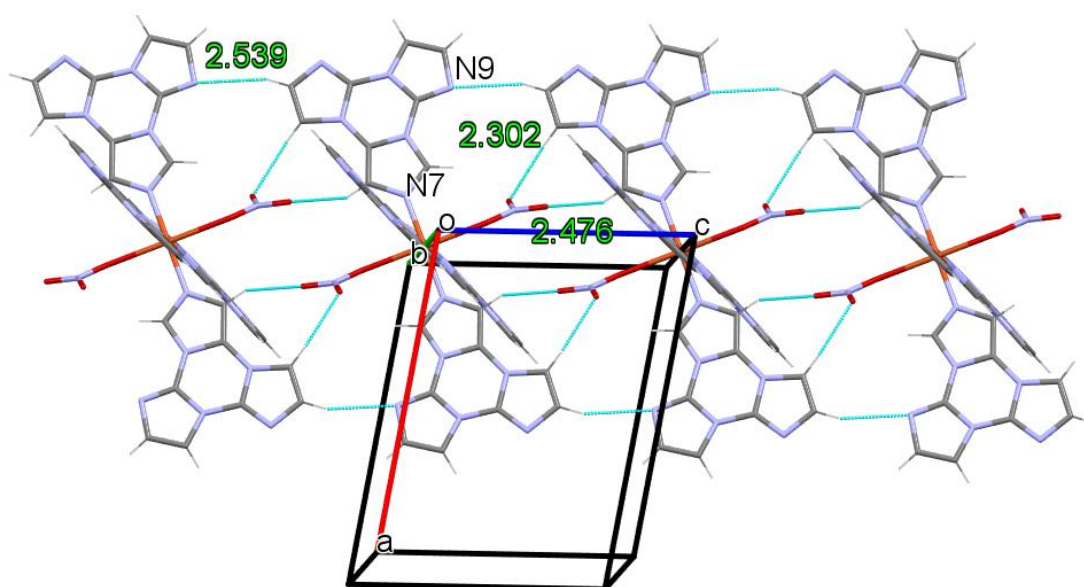

**Figure S6.** Association of mononuclear complexes in H-bonded chain in **6**.

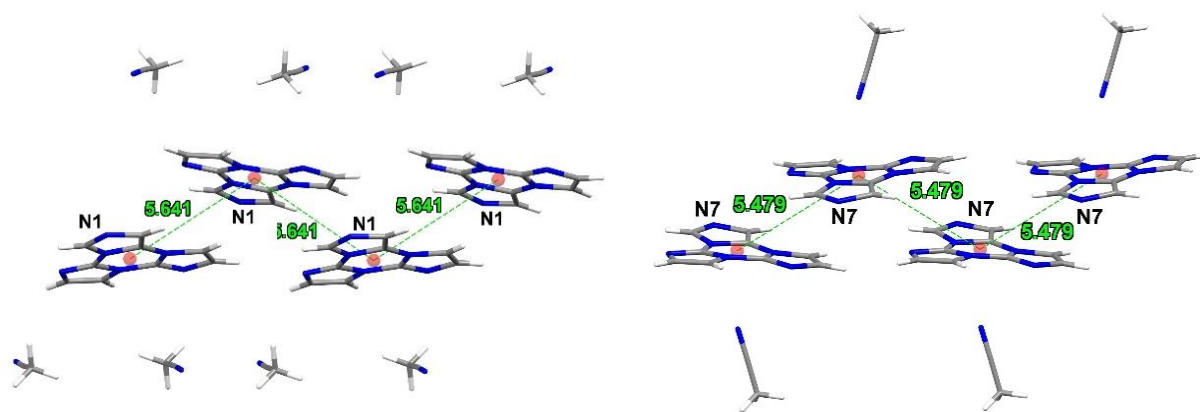

**Figure S7.** Walls of  $L_2$  luminophores in **5** surrounded by acetonitrile solvent with indication of  $Cg(L_2)\dots Cg(L_2)$  separations.

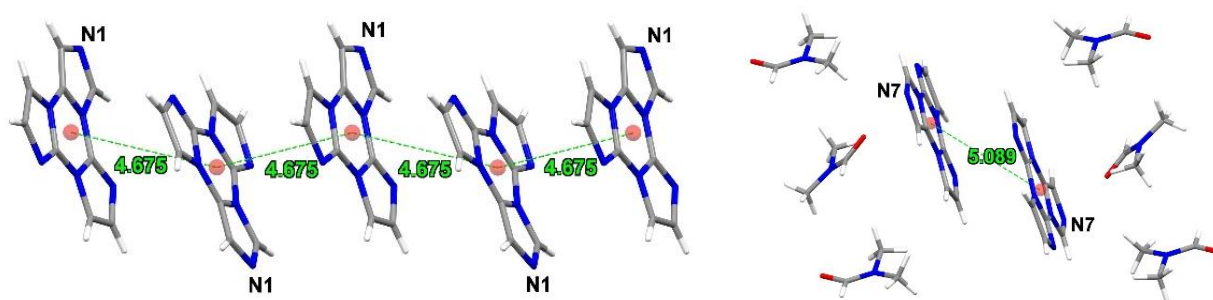

**Figure S8.** Complex 6. View of infinite stacking of  $L_2$  luminophores (defined by N1 atom) along the  $c$  axis with the interplanar angle of  $8.53^\circ$ , and the stacking dimers ( $L_2$  - defined by N7 atom) completely locked by dmf molecules.

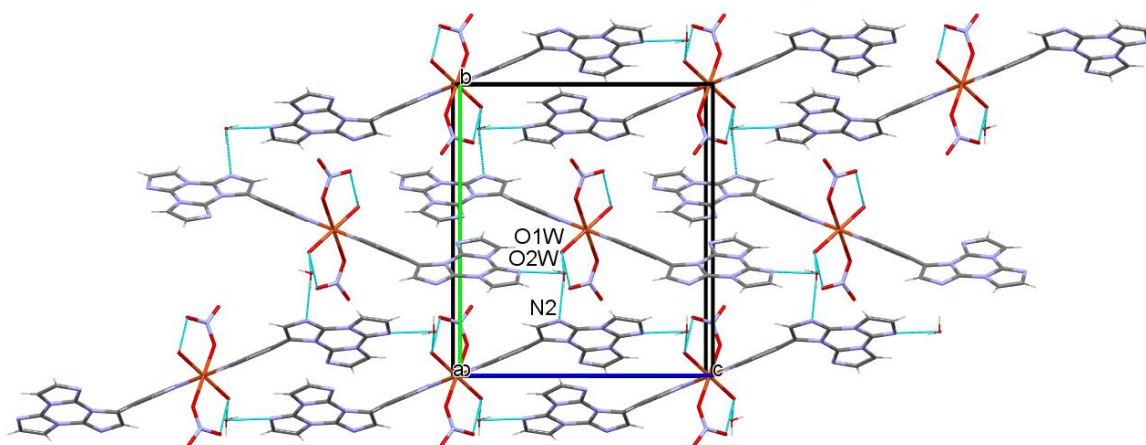

**Figure S9.** Representation of crystal structure 7. View of three neighboring H-bonded double chains situated in T-shape mode and interconnected *via* bridging O2w water molecule in DDA mode.

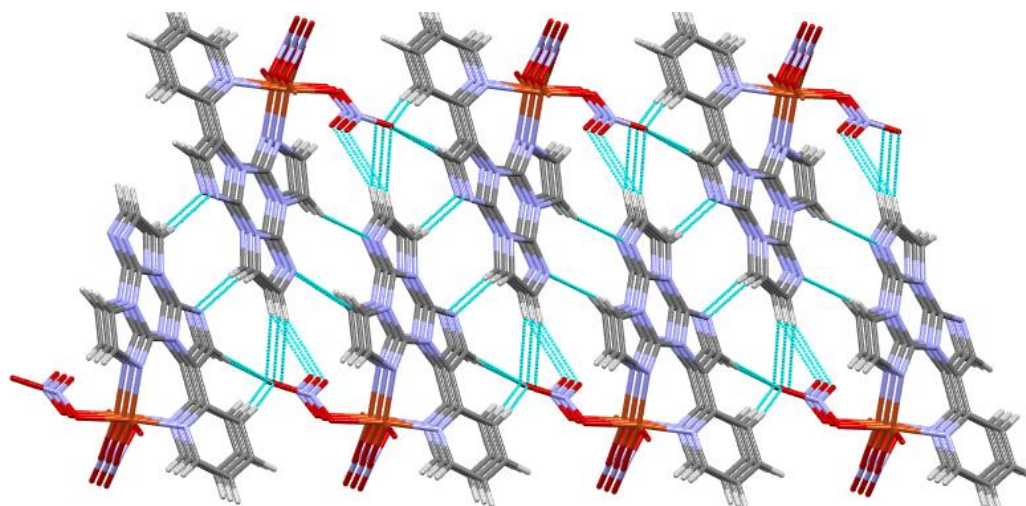

**Figure S10.** Interplay of weak intermolecular interactions in 8.

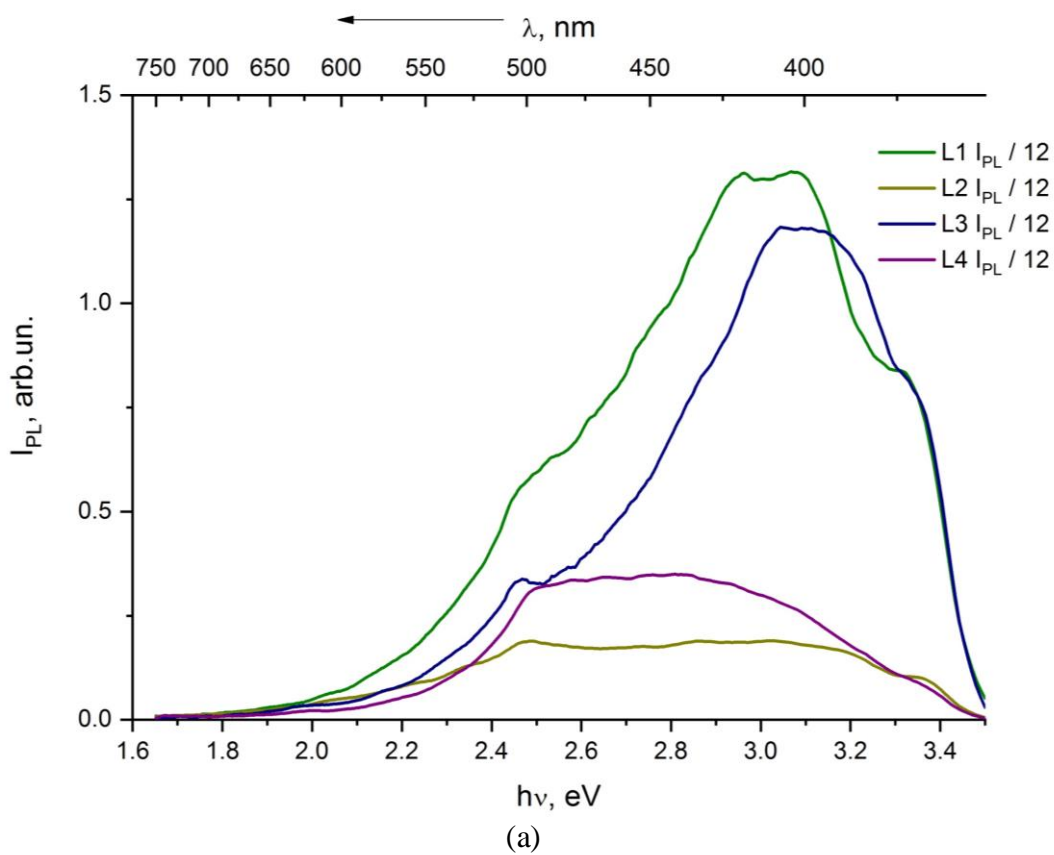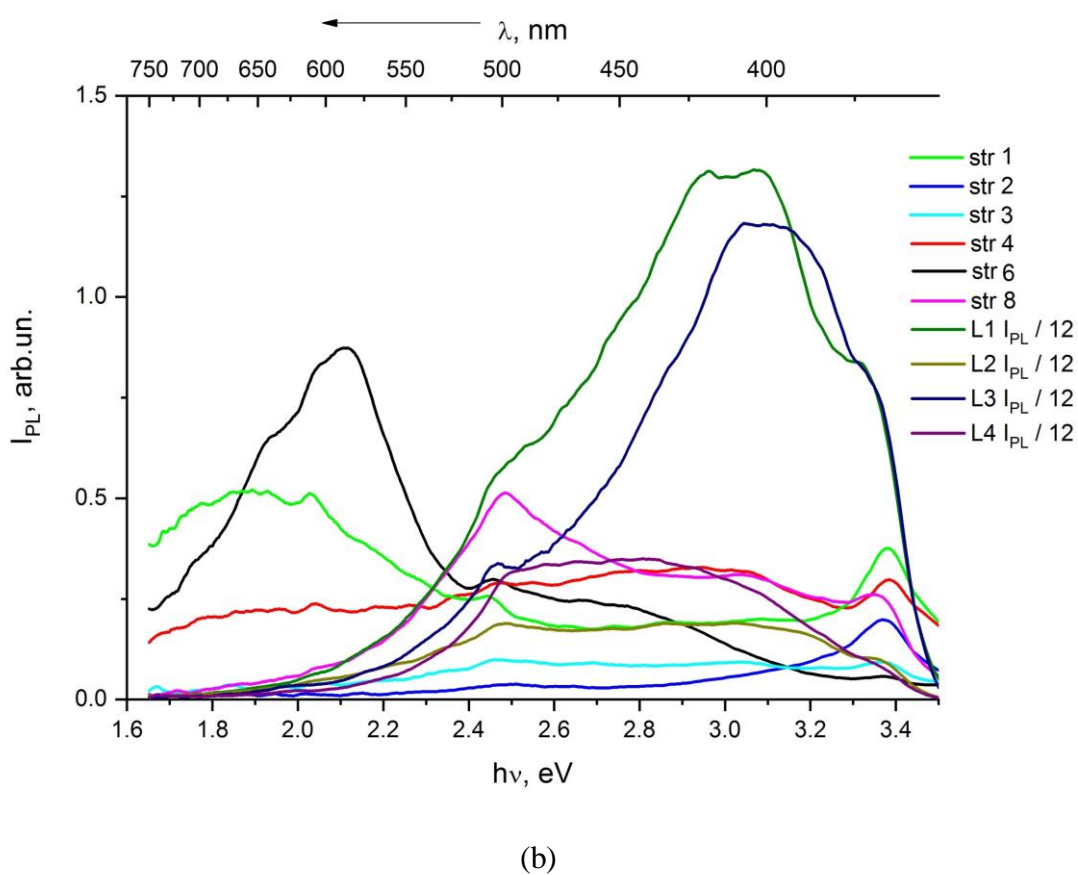

**Figure S11.** Solid state emission spectra of (a) L<sub>1</sub>-L<sub>4</sub> luminophores ; (b) L<sub>1</sub>-L<sub>4</sub> luminophores and compounds **1-4**, **6**, **8**.
